# Supplementary material for: Alternative CUG Codon Usage in the Halotolerant Yeast Debaryomyces hansenii: Gene Expression Profiles Provide New Insights into Ambiguous Translation
Source: J Fungi (Basel). 2022 Sep 16;8(9):970. doi: 10.3390/jof8090970 (PMC9502446; doi:10.3390/jof8090970)
Supplement: Supplementary file 1 [file jof-08-00970-s001.zip › Figure S2.pdf]

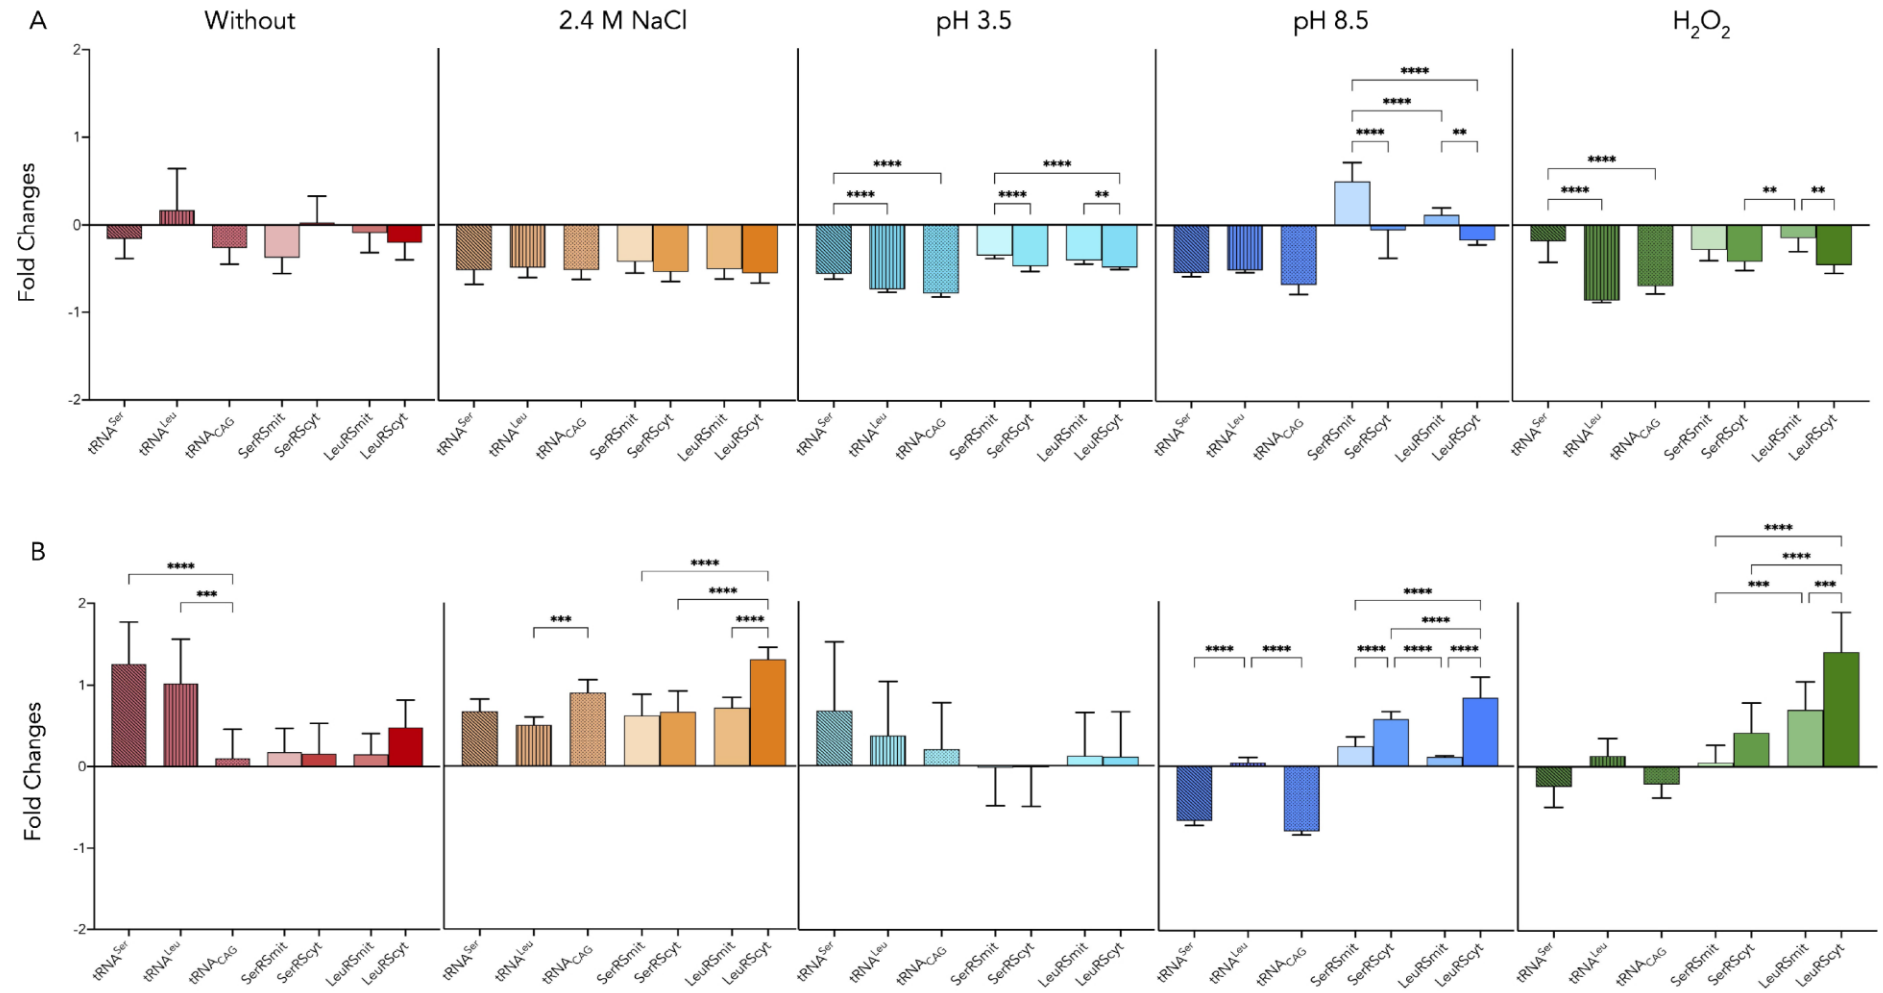

**Figure S2.** RT-qPCR analysis by  $\Delta\Delta CT$  method. Values normalized with *DhRPS3* gene and represented in  $\log_2$  as fold changes of tRNA<sup>CAG</sup>, aaRS, Trna<sup>Ser</sup> and tRNA<sup>Leu</sup> genes under different stress conditions. A) Expression profile of genes compared to each other under stress conditions tested in the logarithmic growth phase. B) Expression profile of genes compared to each other under stress conditions tested in the stationary growth phase.  $p$ -value: 0.01 (\*\*), 0.001 (\*\*\*), 0.0001 (\*\*\*\*).
