# Supplementary material for: Alternative CUG Codon Usage in the Halotolerant Yeast Debaryomyces hansenii: Gene Expression Profiles Provide New Insights into Ambiguous Translation
Source: J Fungi (Basel). 2022 Sep 16;8(9):970. doi: 10.3390/jof8090970 (PMC9502446; doi:10.3390/jof8090970)
Supplement: Supplementary file 1 [file jof-08-00970-s001.zip › Table S1.pdf]

**Table S1.** Oligonucleotides used in this work.

|            | Primer                                    | Sequence (5' - 3')    |
|------------|-------------------------------------------|-----------------------|
| <i>P1</i>  | <i>LeuRScitFw</i>                         | TGCTACGAAGTCCAAGGCTG  |
| <i>P2</i>  | <i>LeuRScitRv</i>                         | CTCCAGTCAACTCTACCACCG |
| <i>P3</i>  | <i>LeuRSmitFw</i>                         | TATGGTGGATGAACTGGCCG  |
| <i>P4</i>  | <i>LeuRSmitRv</i>                         | GCATTTTCCGCTGGTAACCC  |
| <i>P5</i>  | <i>SerRScitFw</i>                         | TGAACAAGAGCAAAAAGGCCG |
| <i>P6</i>  | <i>SerRScitRv</i>                         | ATTTGGCTTCAGCACCAGTAC |
| <i>P7</i>  | <i>SerRSmitFw</i>                         | TCTCTGGGTCCTCGTGGTAC  |
| <i>P8</i>  | <i>SerRSmitRv</i>                         | TGTTGTTCTCCGTTTTGGTCG |
| <i>P9</i>  | <i>tRNA<sub>CAG</sub>Fw</i>               | GATACGATGGCCGAGTGG    |
| <i>P10</i> | <i>tRNA<sub>CAG</sub>Rv</i>               | CGACACGAGCAGGGTTCG    |
| <i>P11</i> | <i>tRNA<sub>CGA</sub><sup>Ser</sup>Fw</i> | GACAATGTGGCCGAGTGGT   |
| <i>P12</i> | <i>tRNA<sub>CGA</sub><sup>Ser</sup>Rv</i> | CGACAACAGCAGGATTCGA   |
| <i>P13</i> | <i>tRNA<sub>AAG</sub><sup>Leu</sup>Fw</i> | CTCTGGCCGAGTTGGTCTAA  |
| <i>P14</i> | <i>tRNA<sub>AAG</sub><sup>Leu</sup>Rv</i> | AGATTCGAACTCGCGCCT    |
| <i>P15</i> | <i>DhRPS3Fw</i>                           | AAGGACCCAGCAACCAACAA  |
| <i>P16</i> | <i>DhRPS3Rv</i>                           | AAGCGGAAGCTTCAACTGGT  |
