# Supplementary material for: Alternative CUG Codon Usage in the Halotolerant Yeast Debaryomyces hansenii: Gene Expression Profiles Provide New Insights into Ambiguous Translation
Source: J Fungi (Basel). 2022 Sep 16;8(9):970. doi: 10.3390/jof8090970 (PMC9502446; doi:10.3390/jof8090970)
Supplement: Supplementary file 1 [file jof-08-00970-s001.zip › Table S2.pdf]

**Table S2.** *D. hansenii* proteins that change their isoelectric point value by at least 0.1 from Serine to Leucine.

| Protein        | Gene                      | CTG | Size (aa) |
|----------------|---------------------------|-----|-----------|
| XP_002770445.1 | DEHA2E08426g              | 2   | 57        |
| XP_457568.1    | 60S ribosomal protein L35 | 4   | 120       |
| XP_459098.1    | 40S ribosomal protein S28 | 4   | 67        |
| XP_457469.2    | DEHA2B11858g              | 4   | 104       |
| XP_459116.2    | DEHA2D14630g              | 4   | 30        |
| XP_457675.2    | DEHA2B16632g              | 5   | 65        |
| XP_458926.2    | DEHA2D10582g              | 5   | 149       |
| XP_458496.1    | DEHA2D00638g              | 6   | 62        |
| XP_457418.1    | DEHA2B10692g              | 7   | 147       |
| XP_459093.2    | DEHA2D14146g              | 7   | 50        |
| XP_457547.1    | DEHA2B13816g              | 7   | 31        |
| XP_457158.1    | DEHA2B04510g              | 9   | 59        |
| XP_459358.1    | DEHA2E00682g              | 11  | 113       |
| XP_456943.1    | DEHA2A14102g              | 11  | 245       |
| XP_457337.2    | DEHA2B08778g              | 14  | 354       |
| XP_459047.1    | DEHA2D13178g              | 16  | 83        |
