# Supplementary material for: Alternative CUG Codon Usage in the Halotolerant Yeast Debaryomyces hansenii: Gene Expression Profiles Provide New Insights into Ambiguous Translation
Source: J Fungi (Basel). 2022 Sep 16;8(9):970. doi: 10.3390/jof8090970 (PMC9502446; doi:10.3390/jof8090970)
Supplement: Supplementary file 1 [file jof-08-00970-s001.zip › Table S3.pdf]

**Table S3.** *D. hansenii* proteins that change their isoelectric point value by at least 0.1 from Serine to Leucine tracked with AmiGO by Gene Ontology.

| Protein     | pI<br>variation<br>value | Genes                     | Homology                                                         | Function                                                                                                                                                                                                              |
|-------------|--------------------------|---------------------------|------------------------------------------------------------------|-----------------------------------------------------------------------------------------------------------------------------------------------------------------------------------------------------------------------|
| XP_458926.2 | 0.1                      | DEHA2D10582g              | Similar to protein P06787 from <i>S. cerevisiae</i> YBR109c CMD1 | Regulates Ca <sup>++</sup> independent processes (mitosis, bud growth, actin organization, endocytosis) and dependent processes (stress-activated pathways).                                                          |
| XP_456943.1 | 0.1                      | DEHA2A14102g              | Similar to Q03406 from <i>S. cerevisiae</i> YDR489W SLD5         | Subunit of the GINS complex, important in the initiation of DNA replication and is involved in the assembly of the DNA replication machinery.                                                                         |
| XP_459047.1 | 0.1                      | DEHA2D13178g              | Similar to CA0138 I CaINH1 from <i>C. albicans</i> INH1          | Mitochondrial ATPase inhibitor                                                                                                                                                                                        |
| XP_457418.1 | 0.1                      | DEHA2B10692g              | Similar to Q06213 from <i>S. cerevisiae</i> YPR168W NUT2         | Subunit of the RNA polymerase II mediator complex; associates with core polymerase subunits to form the RNA polymerase II holoenzyme; transcriptional activation and basal transcription.                             |
| XP_457337.2 | 0.1                      | DEHA2B08778g              | Similar to Q04651 from <i>S. cerevisiae</i> YML067C ERV41        | Forms a complex with Erv46p, involved in the membrane fusion stage of transport; has homology to human ERGIC2 (PTX1) protein. Facilitates retrograde transport from the Golgi apparatus to the endoplasmic reticulum. |
| XP_459098.1 | 0.1                      | 40S ribosomal protein S28 | Similar to P02380 from <i>S. cerevisiae</i> YLR264W RPS28B       | Protein component of the small (40S) ribosomal subunit.                                                                                                                                                               |

|             |     |                           |                                                                                                                |                                                         |
|-------------|-----|---------------------------|----------------------------------------------------------------------------------------------------------------|---------------------------------------------------------|
| XP_457568.1 | 0.1 | 60S ribosomal protein L35 | Similar to P39741 from <i>S. cerevisiae</i> YDL191W RPL35A and P39741 from <i>S. cerevisiae</i> YDL136W RPL35B | Protein component of the large (60S) ribosomal subunit. |
|-------------|-----|---------------------------|----------------------------------------------------------------------------------------------------------------|---------------------------------------------------------|
