# Supplementary material for: Alternative CUG Codon Usage in the Halotolerant Yeast Debaryomyces hansenii: Gene Expression Profiles Provide New Insights into Ambiguous Translation
Source: J Fungi (Basel). 2022 Sep 16;8(9):970. doi: 10.3390/jof8090970 (PMC9502446; doi:10.3390/jof8090970)
Supplement: Supplementary file 1 [file jof-08-00970-s001.zip › Table S4.pdf]

**Table S4.** *D. hansenii* proteins with major change in hydropathy value (Hydropathy values that varies  $\geq 0.03$  for Kyte & Doolittle and  $\geq 0.3$  for the two Eisenberg scales) tracked with AmiGO by Gene Ontology.

| Protein     | Variation value [32] | Variation value [33] | Variation value [34] | Associated gene | Homology (NCBI)                                                                                               | Function (AmiGO)                                                                                                                                                                                                                                                                                                                      |
|-------------|----------------------|----------------------|----------------------|-----------------|---------------------------------------------------------------------------------------------------------------|---------------------------------------------------------------------------------------------------------------------------------------------------------------------------------------------------------------------------------------------------------------------------------------------------------------------------------------|
| XP_456392.1 | 1                    | 0.16                 | 0.25                 | DEHA2A01232g    | Similar to uniprot Q12287 <i>S. cerevisiae</i>                                                                | <ul style="list-style-type: none"> <li>- Mitochondrial intermembrane space</li> <li>- Copper chaperone activity</li> <li>- Copper ion binding</li> <li>- Copper ion transport</li> </ul>                                                                                                                                              |
| XP_457499.1 | 0.4                  | 0.07                 | 0.11                 | DEHA2B12518g    | Highly similar to uniprot P33331 <i>S. cerevisiae</i> YER009W NTF2 Nuclear envelope protein                   | <ul style="list-style-type: none"> <li>- Intracellular anatomical structure</li> <li>- Transport</li> </ul>                                                                                                                                                                                                                           |
| XP_458669.1 | 0.4                  | 0.08                 | 0.12                 | DEHA2D04664g    | Similar to uniprot P40422 <i>S. cerevisiae</i>                                                                | <ul style="list-style-type: none"> <li>- DNA-templated transcription</li> <li>- DNA binding</li> <li>- DNA-directed 5'-3'</li> <li>- RNA polymerase activity</li> </ul>                                                                                                                                                               |
| XP_459366.1 | 0.4                  | 0.06                 | 0.11                 | DEHA2E00858g    | Similar to gn1 GLV CAGL0K0 5841g <i>C. glabrata</i>                                                           | <ul style="list-style-type: none"> <li>- DNA-binding transcription factor activity</li> <li>- RNA polymerase II-specific regulation of DNA-templated transcription</li> <li>- Nucleus</li> <li>- Zinc ion binding</li> </ul>                                                                                                          |
| XP_457269.1 | 0.5                  | 0.09                 | 0.14                 | DEHA2B07150g    | Highly similar to CA2973 IPF14452.re peat1 <i>Candida</i>                                                     | <ul style="list-style-type: none"> <li>- Proton-transporting ATPase activity, rotational mechanism</li> <li>- Proton-transporting ATP synthase activity, rotational mechanism</li> <li>- Proton motive force-driven ATP synthesis</li> <li>- Mitochondrial proton-transporting ATP synthase complex, catalytic sector F(1)</li> </ul> |
| XP_459047.1 | 0.9                  | 0.15                 | 0.24                 | DEHA2D13178g    | Similar to CA0138 CaINH1 <i>C. albicans</i> INH1                                                              | <ul style="list-style-type: none"> <li>- Mitochondrion</li> <li>- Negative regulation of ATP-dependent activity</li> <li>- Negative regulation of nucleotide metabolic process</li> <li>- Enzyme inhibitor activity</li> <li>- ATPase inhibitor activity</li> </ul>                                                                   |
| XP_458059.2 | 0.3                  | 0.05                 | 0.07                 | DEHA2C08756g    | Weakly similar to uniprot Q12223 <i>S. cerevisiae</i> YDL059C RAD59 Protein involved in the repair of double- | <ul style="list-style-type: none"> <li>- Double-strand break repair via single-strand annealing</li> <li>- DNA repair</li> <li>- DNA recombination</li> </ul>                                                                                                                                                                         |

|             |     |      |      |                                                   |                                                                                                                     |                                                                                                                                                          |
|-------------|-----|------|------|---------------------------------------------------|---------------------------------------------------------------------------------------------------------------------|----------------------------------------------------------------------------------------------------------------------------------------------------------|
|             |     |      |      |                                                   | strand breaks in DNA during vegetative growth via recombination and single-strand annealing                         |                                                                                                                                                          |
| XP_458647.2 | 0.3 | 0.04 | 0.06 | DEHA2D04136g                                      | Similar to CA3804 CaRIM1 C. albicans                                                                                | - Mitochondrial nucleoid<br>- Single-stranded telomeric DNA binding<br>- Single-stranded DNA binding<br>- Mitochondrion<br>- Single-stranded DNA binding |
| XP_456489.2 | 0.4 | 0.07 | 0.1  | Putative mitochondrial 54S ribosomal protein RTC6 | Similar to uniprot O14464 S. cerevisiae                                                                             | No homology found                                                                                                                                        |
| XP_457892.2 | 0.6 | 0.11 | 0.17 | DEHA2C04730g                                      | Weakly similar to CA2523 IPF4319 C. albicans                                                                        | No homology found                                                                                                                                        |
| XP_456721.1 | 0.3 | 0.05 | 0.08 | DEHA2A08998g                                      | Highly similar to uniprot Q02772 S. cerevisiae YJR034W PET191                                                       | No homology found                                                                                                                                        |
| XP_457026.2 | 0.3 | 0.04 | 0.06 | DEHA2B01364g                                      | Similar to uniprot P42949 S. cerevisiae YJL104w PAM1                                                                | No homology found                                                                                                                                        |
| XP_457333.2 | 0.3 | 0.04 | 0.07 | DEHA2B08668g                                      | Similar to CA4994 IPF2033 C. albicans IPF2033                                                                       | No homology found                                                                                                                                        |
| XP_458005.2 | 0.3 | 0.05 | 0.07 | DEHA2C07436g                                      | Some similarities with CA2824 IPF17888 C. albicans                                                                  | No homology found                                                                                                                                        |
| XP_458063.1 | 0.3 | 0.05 | 0.08 | Mitochondrial 54S ribosomal protein IMG2          | Weakly similar to uniprot P25642 S. cerevisiae YCR071C IMG2<br>Mitochondrial ribosomal protein of the small subunit | No homology found                                                                                                                                        |
| XP_458072.1 | 0.3 | 0.06 | 0.1  | DEHA2C09086g                                      | Highly similar to uniprot Q6Q546 S. cerevisiae YNR032C-A HUB1 Ubiquitin-like protein modifier                       | No homology found                                                                                                                                        |

|             |     |      |      |                           |                                                                                                                                                                                                         |                   |
|-------------|-----|------|------|---------------------------|---------------------------------------------------------------------------------------------------------------------------------------------------------------------------------------------------------|-------------------|
| XP_458091.1 | 0.3 | 0.05 | 0.08 | DEHA2C09438g              | Similar to uniprot P53869 <i>S. cerevisiae</i> YNL211c                                                                                                                                                  | No homology found |
| XP_458277.2 | 0.3 | 0.04 | 0.05 | DEHA2C13772g              | Highly similar to uniprot O74700 <i>S. cerevisiae</i> YEL020W-A TIM9 Mitochondrial intermembrane space protein                                                                                          | No homology found |
| XP_458377.1 | 0.3 | 0.05 | 0.08 | DEHA2C15884g              | Similar to uniprot Q5KNV4 <i>Cryptococcus neoformans</i> var CNA05180 and gnl GLV YALI0C21789g <i>Yarrowia lipolytica</i>                                                                               | No homology found |
| XP_458610.2 | 0.3 | 0.05 | 0.08 | DEHA2D03278g              | Weakly similar to uniprot Q08963 <i>S. cerevisiae</i> YPL213w LEA1 U2 A snRNP protein                                                                                                                   | No homology found |
| XP_459101.1 | 0.3 | 0.05 | 0.08 | DEHA2D14322g              | Similar to uniprot Q02771 <i>S. cerevisiae</i> YER058W PET117 Protein required for assembly of cytochrome c oxidase                                                                                     | No homology found |
| XP_459104.1 | 0.3 | 0.05 | 0.08 | 60S ribosomal protein L34 | Highly similar to uniprot P40525 <i>S. cerevisiae</i> YIL052C RPL34B Protein component of the large (60S) ribosomal subunit nearly identical to Rpl34Ap and has similarity to rat L34 ribosomal protein | No homology found |
| XP_459358.1 | 0.5 | 0.08 | 0.12 | DEHA2E00682g              | No homology found                                                                                                                                                                                       | No homology found |
| XP_457675.2 | 0.4 | 0.07 | 0.1  | DEHA2B16632g              | No homology found                                                                                                                                                                                       | No homology found |
| XP_459093.2 | 0.6 | 0.11 | 0.17 | DEHA2D14146g              | No homology found                                                                                                                                                                                       | No homology found |
| XP_459116.2 | 0.6 | 0.11 | 0.17 | DEHA2D14630g              | No homology found                                                                                                                                                                                       | No homology found |
| XP_458415.1 | 0.4 | 0.07 | 0.11 | DEHA2C16720g              | No homology found                                                                                                                                                                                       | No homology found |

|             |     |      |      |              |                   |                   |
|-------------|-----|------|------|--------------|-------------------|-------------------|
| XP_457158.1 | 0.7 | 0.12 | 0.19 | DEHA2B04510g | No homology found | No homology found |
| XP_457278.1 | 0.7 | 0.12 | 0.18 | DEHA2B07348g | No homology found | No homology found |
| XP_456695.1 | 0.3 | 0.04 | 0.07 | DEHA2A08426g | No homology found | No homology found |
| XP_458496.1 | 0.4 | 0.07 | 0.12 | DEHA2D00638g | No homology found | No homology found |
| XP_458602.1 | 0.4 | 0.08 | 0.12 | DEHA2D03102g | No homology found | No homology found |
| XP_457547.1 | 1.0 | 0.18 | 0.28 | DEHA2B13816g | No homology found | No homology found |
| XP_457581.2 | 0.3 | 0.04 | 0.07 | DEHA2B14586g | No homology found | No homology found |
| XP_457070.2 | 0.4 | 0.06 | 0.1  | DEHA2B02354g | No homology found | No homology found |
| XP_459460.1 | 0.4 | 0.07 | 0.1  | DEHA2E03036g | No homology found | No homology found |
| XP_457089.1 | 0.5 | 0.09 | 0.14 | DEHA2B02860g | No homology found | No homology found |
| XP_457615.2 | 0.4 | 0.06 | 0.1  | DEHA2B15312g | No homology found | No homology found |
| XP_459330.1 | 0.5 | 0.07 | 0.12 | DEHA2D19360g | No homology found | No homology found |
| XP_458622.1 | 0.3 | 0.05 | 0.08 | DEHA2D03542g | No homology found | No homology found |
| XP_462639.2 | 0.3 | 0.04 | 0.06 | DEHA2G25080g | No homology found | No homology found |
